# Supplementary material for: Chlorogenic Acid Prevents Microglia-Induced Neuronal Apoptosis and Oxidative Stress under Hypoxia-Ischemia Environment by Regulating the MIR497HG/miR-29b-3p/SIRT1 Axis
Source: Hindawi journal article supplement (doi:10.1155/2022/1194742), 2022-05-25
Supplement: f1 [file 1194742.f1.docx]

Supplementary figure 1


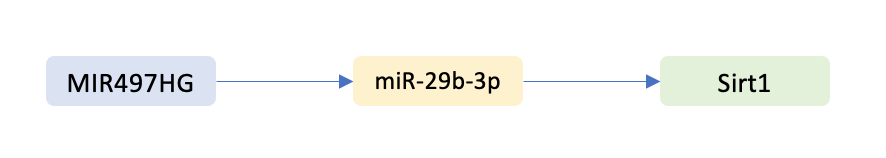


The correlation between MIR497HG, miR-29b-3p and Sirt1. MIR497HG sponges miR-29b-3p to regulate SIRT1 expression in an indirect manner.
